# Supplementary material for: Sho1 and Msb2 Play Complementary but Distinct Roles in Stress Responses, Sexual Differentiation, and Pathogenicity of Cryptococcus neoformans
Source: PubMed Central journal article supplement (PMC6288190; doi:10.3389/fmicb.2018.02958), 2018-12-04
Supplement: Data_Sheet_1.pdf [file Data_Sheet_1.pdf]

**Supplementary Table S1. *C. neoformans* strains used in this study**

| Strain  | Genotype                                                                                                               | Parent  | Reference                          |
|---------|------------------------------------------------------------------------------------------------------------------------|---------|------------------------------------|
| H99     | <i>MAT</i> $\alpha$                                                                                                    |         | (Perfect <i>et al.</i> , 1993)     |
| KN99    | <i>MAT</i> $\alpha$                                                                                                    |         | (Nielsen <i>et al.</i> , 2003)     |
| YSB64   | <i>MAT</i> $\alpha$ <i>hog1</i> $\Delta$ :: <i>NAT-STM#177</i>                                                         | H99     | (Bahn <i>et al.</i> , 2005)        |
| YSB123  | <i>MAT</i> $\alpha$ <i>pbs2</i> $\Delta$ :: <i>NAT-STM#213</i>                                                         | H99     | (Bahn <i>et al.</i> , 2005)        |
| YSB261  | <i>MAT</i> $\alpha$ <i>ssk1</i> $\Delta$ :: <i>NAT-STM#205</i>                                                         | H99     | (Bahn <i>et al.</i> , 2006)        |
| YSB264  | <i>MAT</i> $\alpha$ <i>ssk2</i> $\Delta$ :: <i>NAT-STM#210</i>                                                         | H99     | (Bahn <i>et al.</i> , 2007)        |
| YSB349  | <i>MAT</i> $\alpha$ <i>skn7</i> $\Delta$ :: <i>NAT-STM#201</i>                                                         | H99     | (Bahn <i>et al.</i> , 2006)        |
| YSB278  | <i>MAT</i> $\alpha$ <i>tco1</i> $\Delta$ :: <i>NAT-STM#102</i>                                                         | H99     | (Bahn <i>et al.</i> , 2006)        |
| YSB281  | <i>MAT</i> $\alpha$ <i>tco2</i> $\Delta$ :: <i>NAT-STM#116</i>                                                         | H99     | (Bahn <i>et al.</i> , 2006)        |
| YSB324  | <i>MAT</i> $\alpha$ <i>tco1</i> $\Delta$ :: <i>NAT-STM#102 tco2</i> $\Delta$ :: <i>NEO</i>                             | YSB278  | (Bahn <i>et al.</i> , 2006)        |
| YSB284  | <i>MAT</i> $\alpha$ <i>tco3</i> $\Delta$ :: <i>NAT-STM#119</i>                                                         | H99     | (Bahn <i>et al.</i> , 2006)        |
| YSB417  | <i>MAT</i> $\alpha$ <i>tco4</i> $\Delta$ :: <i>NAT-STM#123</i>                                                         | H99     | (Bahn <i>et al.</i> , 2006)        |
| YSB286  | <i>MAT</i> $\alpha$ <i>tco5</i> $\Delta$ :: <i>NAT-STM#125</i>                                                         | H99     | (Bahn <i>et al.</i> , 2006)        |
| YSB2469 | <i>MAT</i> $\alpha$ <i>tco6</i> $\Delta$ :: <i>NAT-STM#58</i>                                                          | H99     | (Lee <i>et al.</i> , 2016)         |
| YSB348  | <i>MAT</i> $\alpha$ <i>tco7</i> $\Delta$ :: <i>NAT-STM#209</i>                                                         | H99     | (Bahn <i>et al.</i> , 2006)        |
| YSB1719 | <i>MAT</i> $\alpha$ <i>sho1</i> $\Delta$ :: <i>NAT-STM#58</i>                                                          | H99     | (Kim <i>et al.</i> , 2015)         |
| YSB1720 | <i>MAT</i> $\alpha$ <i>sho1</i> $\Delta$ :: <i>NAT-STM#58</i>                                                          | H99     | (Kim <i>et al.</i> , 2015)         |
| YSB1927 | <i>MAT</i> $\alpha$ <i>sho1</i> $\Delta$ :: <i>NEO</i>                                                                 | KN99    | This study                         |
| YSB1928 | <i>MAT</i> $\alpha$ <i>sho1</i> $\Delta$ :: <i>NEO</i>                                                                 | KN99    | This study                         |
| YSB3191 | <i>MAT</i> $\alpha$ <i>msb2</i> $\Delta$ :: <i>NAT-STM#150</i>                                                         | H99     | This study                         |
| YSB3916 | <i>MAT</i> $\alpha$ <i>msb2</i> $\Delta$ :: <i>NEO</i>                                                                 | KN99    | This study                         |
| YSB3605 | <i>MAT</i> $\alpha$ <i>msb2</i> $\Delta$ :: <i>NAT-STM#150 sho1</i> $\Delta$ :: <i>NEO</i>                             | YSB3191 | This study                         |
| YSB3606 | <i>MAT</i> $\alpha$ <i>msb2</i> $\Delta$ :: <i>NAT-STM#150 sho1</i> $\Delta$ :: <i>NEO</i>                             | YSB3191 | This study                         |
| YSB3945 | <i>MAT</i> $\alpha$ <i>msb2</i> $\Delta$ :: <i>NEO sho1</i> $\Delta$ :: <i>NAT-STM#58</i>                              | YSB3916 | This study                         |
| YSB3592 | <i>MAT</i> $\alpha$ <i>SHO1-6</i> $\times$ <i>HA</i>                                                                   | H99     | This study                         |
| YSB3593 | <i>MAT</i> $\alpha$ <i>SHO1-6</i> $\times$ <i>HA</i>                                                                   | H99     | This study                         |
| YSB3631 | <i>MAT</i> $\alpha$ <i>MSB2-4</i> $\times$ <i>FLAG</i>                                                                 | H99     | This study                         |
| YSB3698 | <i>MAT</i> $\alpha$ <i>SHO1-6</i> $\times$ <i>HA MSB2-4</i> $\times$ <i>FLAG</i>                                       | YSB3593 | This study                         |
| YSB2253 | <i>MAT</i> $\alpha$ <i>ssk1</i> $\Delta$ :: <i>NAT-STM#205 sho1</i> $\Delta$ :: <i>NEO</i>                             | YSB261  | This study                         |
| YSB2268 | <i>MAT</i> $\alpha$ <i>hog1</i> $\Delta$ :: <i>NAT-STM#177 sho1</i> $\Delta$ :: <i>NEO</i>                             | YSB64   | This study                         |
| YSB2753 | <i>MAT</i> $\alpha$ <i>sho1</i> $\Delta$ :: <i>SHO1-GFP</i>                                                            | YSB1719 | (Malachowski <i>et al.</i> , 2016) |
| YSB3455 | <i>MAT</i> $\alpha$ <i>MSB2-mCherry</i>                                                                                | H99     | This study                         |
| YSB4132 | <i>MAT</i> $\alpha$ <i>sho1</i> $\Delta$ :: <i>SHO1-GFP MSB2-mCherry</i>                                               | YSB2753 | This study                         |
| YSB3814 | <i>MAT</i> $\alpha$ <i>mpk1</i> $\Delta$ :: <i>NAT</i>                                                                 | H99     | (Lee <i>et al.</i> , 2016)         |
| YSB3816 | <i>MAT</i> $\alpha$ <i>mpk1</i> $\Delta$ :: <i>NAT</i>                                                                 | H99     | (Lee <i>et al.</i> , 2016)         |
| YSB127  | <i>MAT</i> $\alpha$ <i>cpk1</i> $\Delta$ :: <i>NAT</i>                                                                 | H99     | (Lee <i>et al.</i> , 2016)         |
| YSB128  | <i>MAT</i> $\alpha$ <i>cpk1</i> $\Delta$ :: <i>NAT</i>                                                                 | H99     | (Lee <i>et al.</i> , 2016)         |
| YSB6089 | <i>MAT</i> $\alpha$ <i>mpk1</i> $\Delta$ :: <i>NAT cpk1</i> $\Delta$ :: <i>NEO</i>                                     | YSB3814 | This study                         |
| YSB6091 | <i>MAT</i> $\alpha$ <i>mpk1</i> $\Delta$ :: <i>NAT cpk1</i> $\Delta$ :: <i>NEO</i>                                     | YSB3814 | This study                         |
| YSB6674 | <i>MAT</i> $\alpha$ <i>msb2</i> $\Delta$ :: <i>NAT-STM#150 ssk1</i> $\Delta$ :: <i>HYG</i>                             | YSB3191 | This study                         |
| YSB6675 | <i>MAT</i> $\alpha$ <i>msb2</i> $\Delta$ :: <i>NAT-STM#150 sho1</i> $\Delta$ :: <i>NEO mpk1</i> $\Delta$ :: <i>HYG</i> | YSB3606 | This study                         |
| YSB6676 | <i>MAT</i> $\alpha$ <i>msb2</i> $\Delta$ :: <i>NAT-STM#150 sho1</i> $\Delta$ :: <i>NEO mpk1</i> $\Delta$ :: <i>HYG</i> | YSB3606 | This study                         |

Each *NAT-STM#* indicates the *Nat*<sup>r</sup> marker with a unique signature tag.

- Bahn, Y. S., S. Geunes-Boyer and J. Heitman (2007) Ssk2 mitogen-activated protein kinase kinase governs divergent patterns of the stress-activated Hog1 signaling pathway in *Cryptococcus neoformans*. *Eukaryot. Cell* **6**: 2278-2289.
- Bahn, Y. S., K. Kojima, G. M. Cox and J. Heitman (2005) Specialization of the HOG pathway and its impact on differentiation and virulence of *Cryptococcus neoformans*. *Mol. Biol. Cell* **16**: 2285-2300.
- Bahn, Y. S., K. Kojima, G. M. Cox and J. Heitman (2006) A unique fungal two-component system regulates stress responses, drug sensitivity, sexual development, and virulence of *Cryptococcus neoformans*. *Mol. Biol. Cell* **17**: 3122-3135.
- Kim, H., K. W. Jung, S. Maeng, Y. L. Chen, J. Shin, J. E. Shim, *et al.* (2015) Network-assisted genetic dissection of pathogenicity and drug resistance in the opportunistic human pathogenic fungus *Cryptococcus neoformans*. *Sci Rep* **5**: 8767.
- Lee, K. T., Y. S. So, D. H. Yang, K. W. Jung, J. Choi, D. G. Lee, *et al.* (2016) Systematic functional analysis of kinases in the fungal pathogen *Cryptococcus neoformans*. *Nat Commun* **7**: 12766.
- Malachowski, A. N., M. Yosri, G. Park, Y. S. Bahn, Y. He and M. A. Olszewski (2016) Systemic Approach to Virulence Gene Network Analysis for Gaining New Insight into Cryptococcal Virulence. *Front Microbiol* **7**: 1652.
- Nielsen, K., G. M. Cox, P. Wang, D. L. Toffaletti, J. R. Perfect and J. Heitman (2003) Sexual cycle of *Cryptococcus neoformans* var. *grubii* and virulence of congenic  $\alpha$  and  $\alpha$  isolates. *Infection and immunity* **71**: 4831-4841.
- Perfect, J. R., N. Ketabchi, G. M. Cox, C. W. Ingram and C. L. Beiser (1993) Karyotyping of *Cryptococcus neoformans* as an epidemiological tool. *J Clin Microbiol* **31**: 3305-3309.

**Supplementary Table S2. Primers used in this study**

| Primer Name | Sequence (5' to 3')                                     | comments                          |
|-------------|---------------------------------------------------------|-----------------------------------|
| B79         | TGTGGATGCTGGCGGAGGATA                                   | Screening primer                  |
| B1026       | GTAAAACGACGGCCAGTGAGC                                   | M13Forward primer                 |
| B1027       | CAGGAAACAGCTATGACCATG                                   | M13Reverse primer                 |
| B1454       | AAGGTGTTCCCGACGACGAATCG                                 | NAT PCR primer SM1                |
| B1455       | AACTCCGTCGCGAGCCCATCAAC                                 | NAT PCR primer SM2                |
| B1886       | TGGAAGAGATGGATGTGC                                      | NEO Split GSR                     |
| B1887       | ATTGTCTGTTGTGCCAG                                       | NEO Split GSL                     |
| B5751       | CGAAGAATCTCGTGCTTTC                                     | HSM (Hygromycin Split Marker) 1   |
| B5752       | ATTGACCGATTCTTGCG                                       | HSM2                              |
| B4204       | ATCTCCAATCTCCCGAAG                                      | SHO1 PCR primer L1                |
| B4205       | TCACTGGCCGTCGTTTTACAAGAAAGACTGGGTGTCGC                  | SHO1 PCR primer L2                |
| B4206       | CATGGTCATAGTGTTTCTGACACCCGCTGGTATTACAG                  | SHO1 PCR primer R1                |
| B4207       | AAGTTTTCTCCTCACTCGCC                                    | SHO1 PCR primer R2                |
| B4203       | AACGAACGGAAGATTGGC                                      | SHO1 PCR primer SO                |
| B4208       | GCTGCTTACTACATCTGGACG                                   | SHO1 PCR primer PO                |
| B4504       | CGACACCCAGTCTTTCTTG                                     | SHO1 northern blot probe primer 1 |
| B4505       | GTAATACCAGCGGGTGTTC                                     | SHO1 northern blot probe primer 2 |
| B4794       | GTCGACATCTCCAATCTCCCGAAG                                | sho1Δ::SHO1 primer L1             |
| B4795       | GCGGCCGCTCACTTATCGTCGTCATCCTTGTAATCAAGCAAGACAAGGTAATTGG | sho1Δ::SHO1 primer R1             |
| B4796       | GCGGCCGCGACTAAAATGATTGACTTGAAC                          | sho1Δ::SHO1 primer L2             |
| B4797       | CCGCGGAAGTTTTCTCCTCACTCGCC                              | sho1Δ::SHO1 primer R2             |
| B4998       | GCTGCTTACTACATCTGGACG                                   | Sho1::GFP primer seq1             |
| B5614       | GCGGCCGCTCTCCAATCTCCCGAAG                               | Sho1::GFP primer L1               |
| B5610       | GCGGCCGCAAGCAAGACAAGGTAATTGGAG                          | Sho1::GFP primer L2               |
| B6144       | TCACCTACACAGCAGACCAC                                    | MSB2 PCR primer L1                |
| B6145       | CTGGCCGTCGTTTTACATGAAGGCGGTGTGTATCG                     | MSB2 PCR primer L2                |
| B6146       | GTCATAGCTGTTTCTGGCGTTGAGTAAGCCTAAGC                     | MSB2 PCR primer R1                |
| B6147       | GAAGAGATGACGGGAGTTATG                                   | MSB2 PCR primer R2                |
| B6148       | AATCTTCGTCAGTTGTAC                                      | MSB2 PCR primer SO                |
| B6395       | AGAACTGTTGAGAAGGCG                                      | MSB2 PCR primer PO2               |
| B6724       | CGCAACATCATAATCGGTG                                     | MSB2 FLAG PCR primer L1           |
| B6729       | GGCTGCTTTGACAATGG                                       | SHO1 HA PCR primer L1             |
| B6732       | TAATCGCTGAGCCGTTTG                                      | SHO1 HA PCR primer SO             |
| B6900       | CATTCAAACCGCCTCTC                                       | MSB2 mCherry PCR primer L1        |
| B6901       | CTCCTCGCCCTGCTCACAGAGCCACCGCCACCTGCGTG                  | MSB2 mCherry PCR primer L2        |
| B6902       | TGCCACTCGAATCCTGCATGCGACGTGAGACTCGACGG                  | MSB2 mCherry PCR primer R1        |
| B6991       | CCGTTCAAGATCATAACAAC                                    | MSB2 FLAG PCR primer PO           |
| JOHE12039   | CTGTAGAAGATGTGAGTTTGGG                                  | CPK1 PCR primer L1                |
| JOHE12040   | CTGGCCGTCGTTTTACTGATTGATGAGAGATACGGG                    | CPK1 PCR primer L2                |
| JOHE12041   | GTCATAGCTGTTTCTGGGCGGAGAAATAGAGGTTG                     | CPK1 PCR primer R1                |
| JOHE12042   | CGCACAAGAAGTAAGAGGTG                                    | CPK1 PCR primer R2                |
| JOHE12043   | GGCTATGGACCGTATTAC                                      | CPK1 PCR primer SO                |
| JOHE12046   | ATGCTGCTACCGTTAGTC                                      | CPK1 PCR primer PO                |
| B5944       | CCGATTTGGAAGTCGTTG                                      | SSK1 PCR primer L1                |
| B5945       | CTGGCCGTCGTTTTACAATCAAAGAGAGGCTGGG                      | SSK1 PCR primer L2                |
| B5946       | GTCATAGCTGTTTCTGTCTCCATTTGCTCGTCAAG                     | SSK1 PCR primer R1                |
| B5947       | GCAAACCTCAAAAACGCTC                                     | SSK1 PCR primer R2                |
| B5948       | GAAACCTTGTGCTGAGAC                                      | SSK1 PCR primer SO                |
| B3668       | GCAGAGGTTAGAGGAAGTC                                     | SSK1 PCR primer PO                |
| B5930       | TTTGCTGCTCCTCTCTC                                       | MPK1 PCR primer L1                |
| B5931       | TCACTGGCCGTCGTTTTACGAGAAGTAGAGGCAAGTACG                 | MPK1 PCR primer L2                |
| B5932       | CATGGTCATAGCTGTTTCTGTTGGAGAAACAGTTGGAGAG                | MPK1 PCR primer R1                |
| B5933       | TTCAGCAGGTCATCAGG                                       | MPK1 PCR primer R2                |
| B5934       | CGACTCACGATGTAACCTCC                                    | MPK1 PCR primer SO                |
| B5935       | ACCTCAACTCTCTCAGACACC                                   | MPK1 PCR primer PO                |

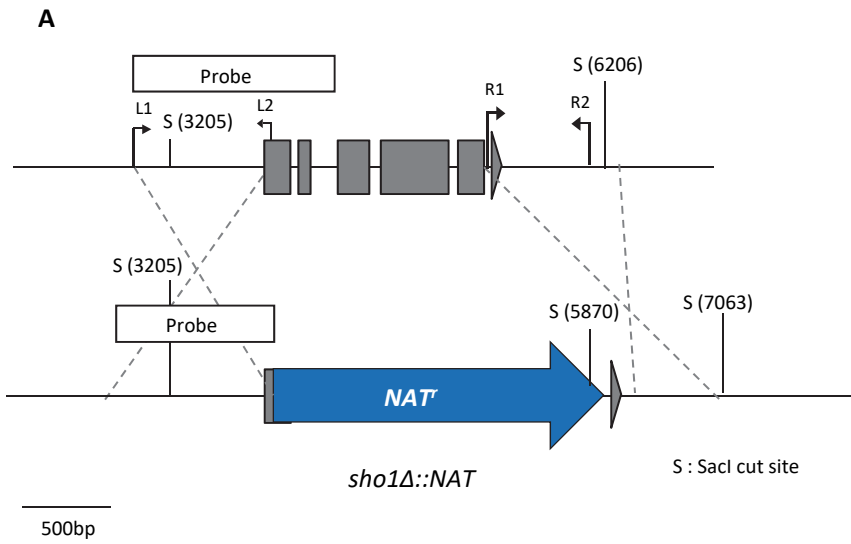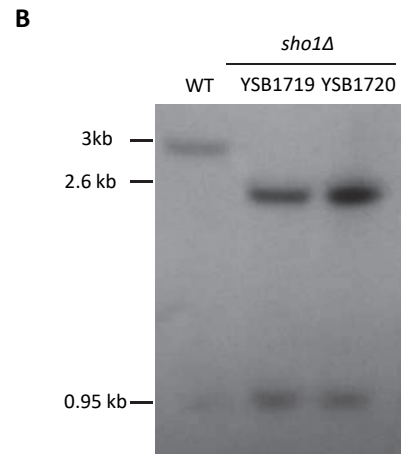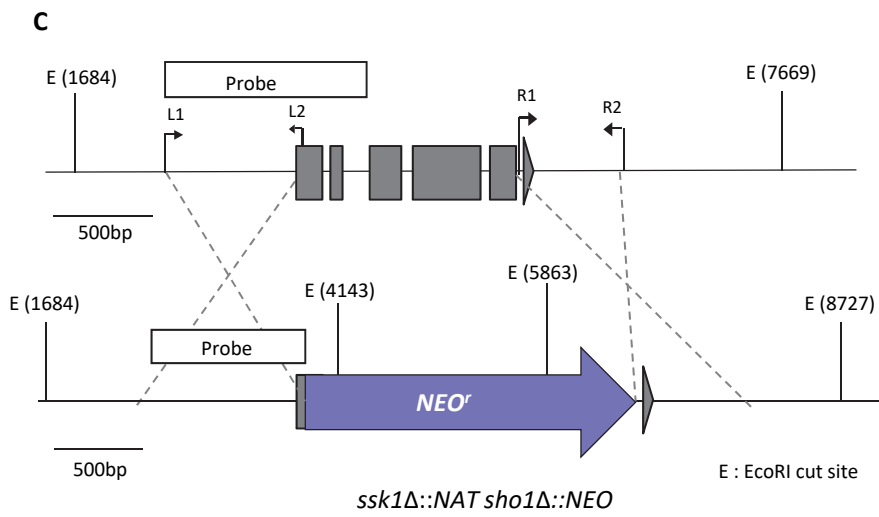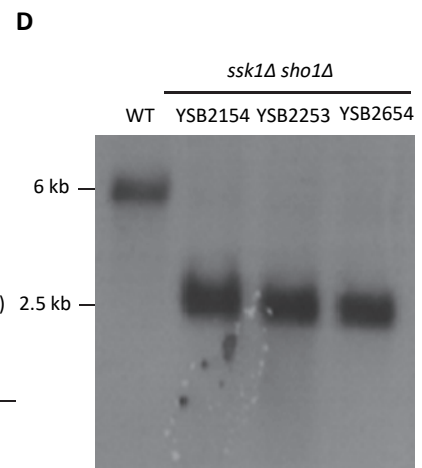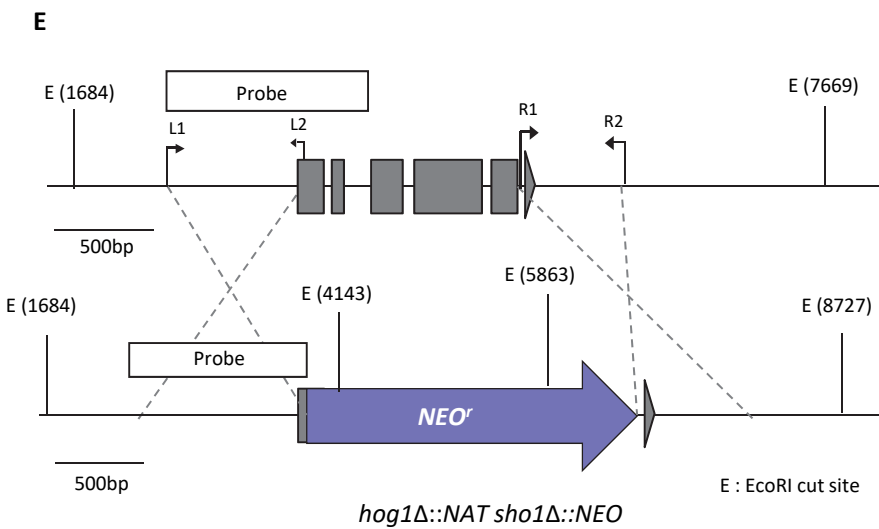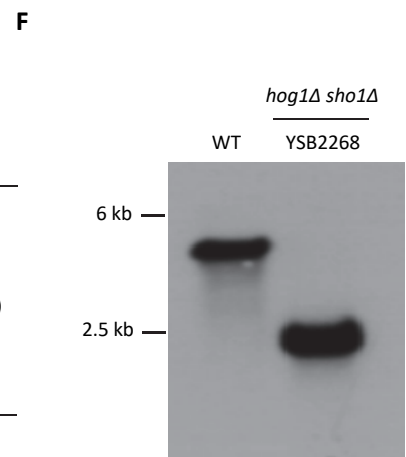

**G**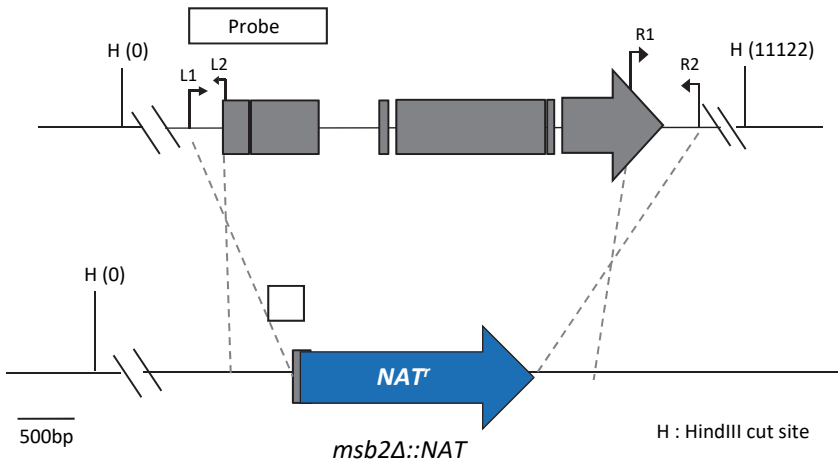**H**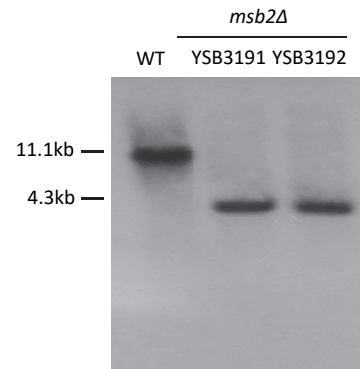**I**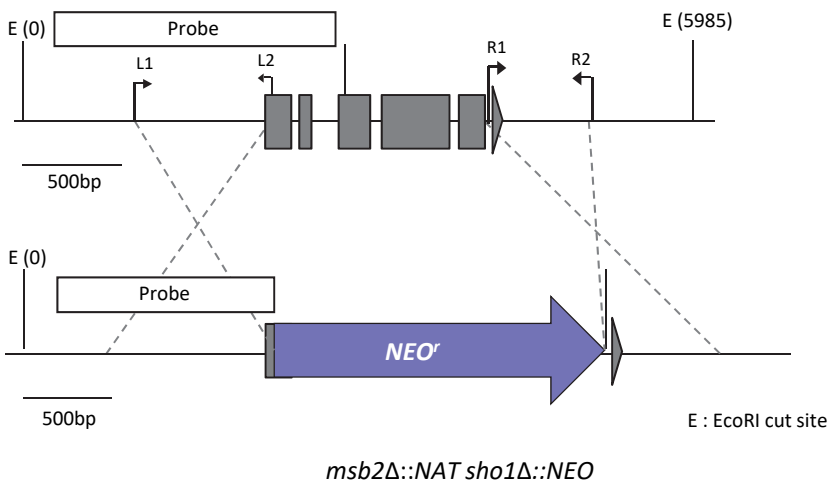**J**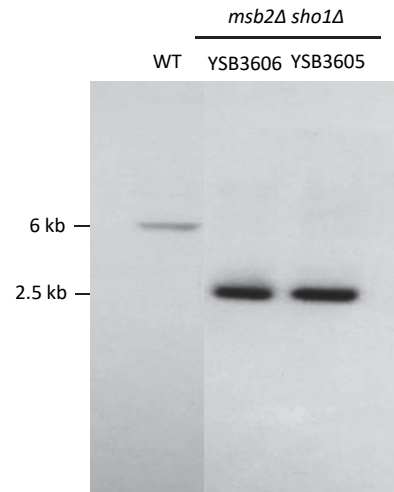**K**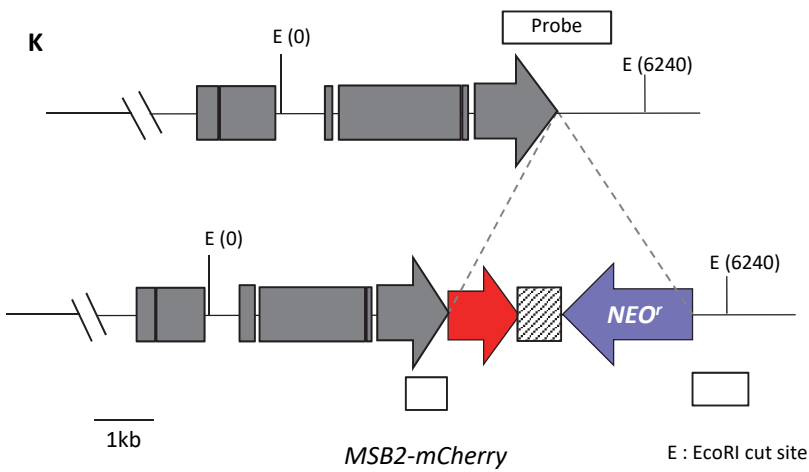**L**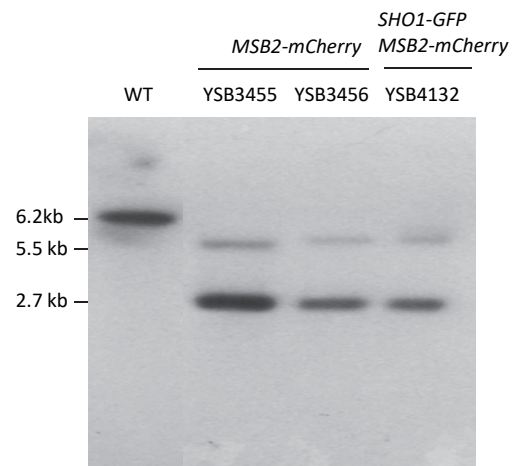

**M**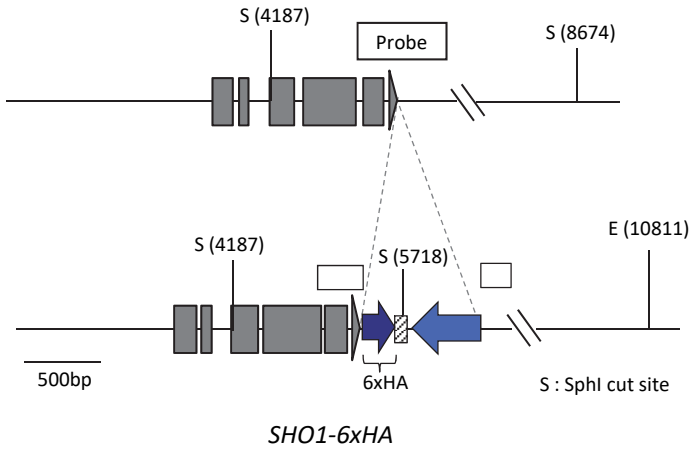**N**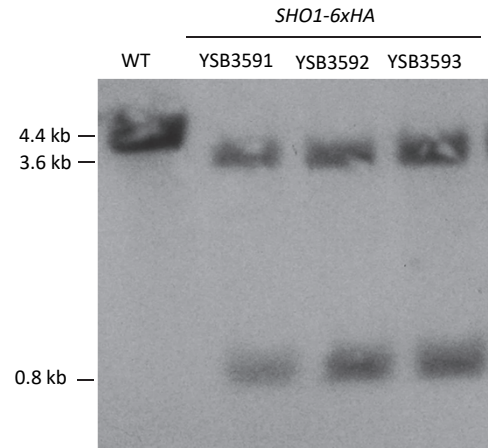**O**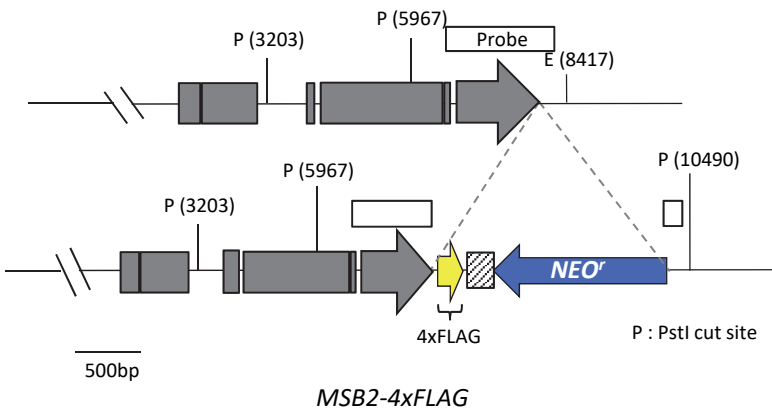**P**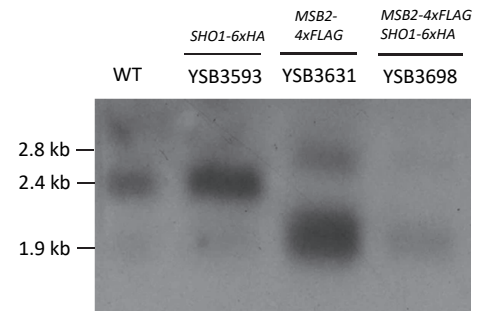**Q**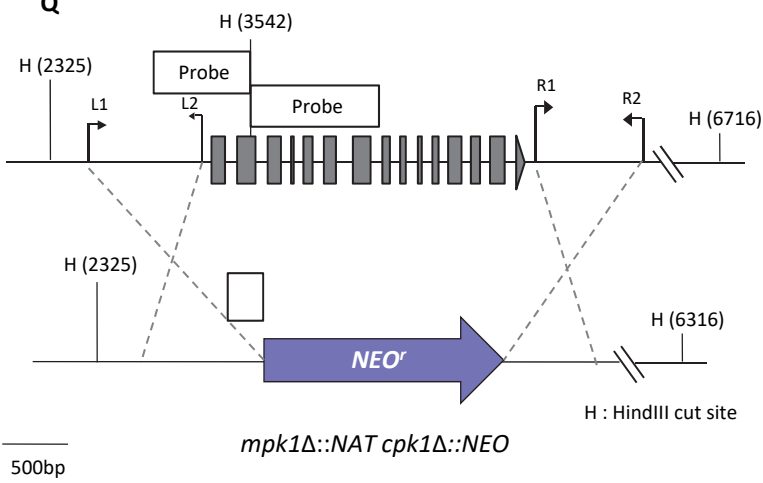**R**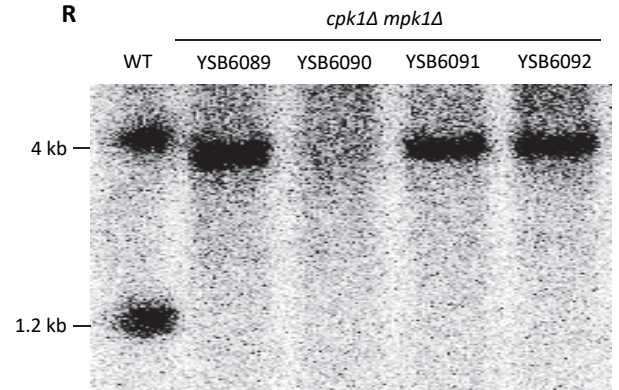

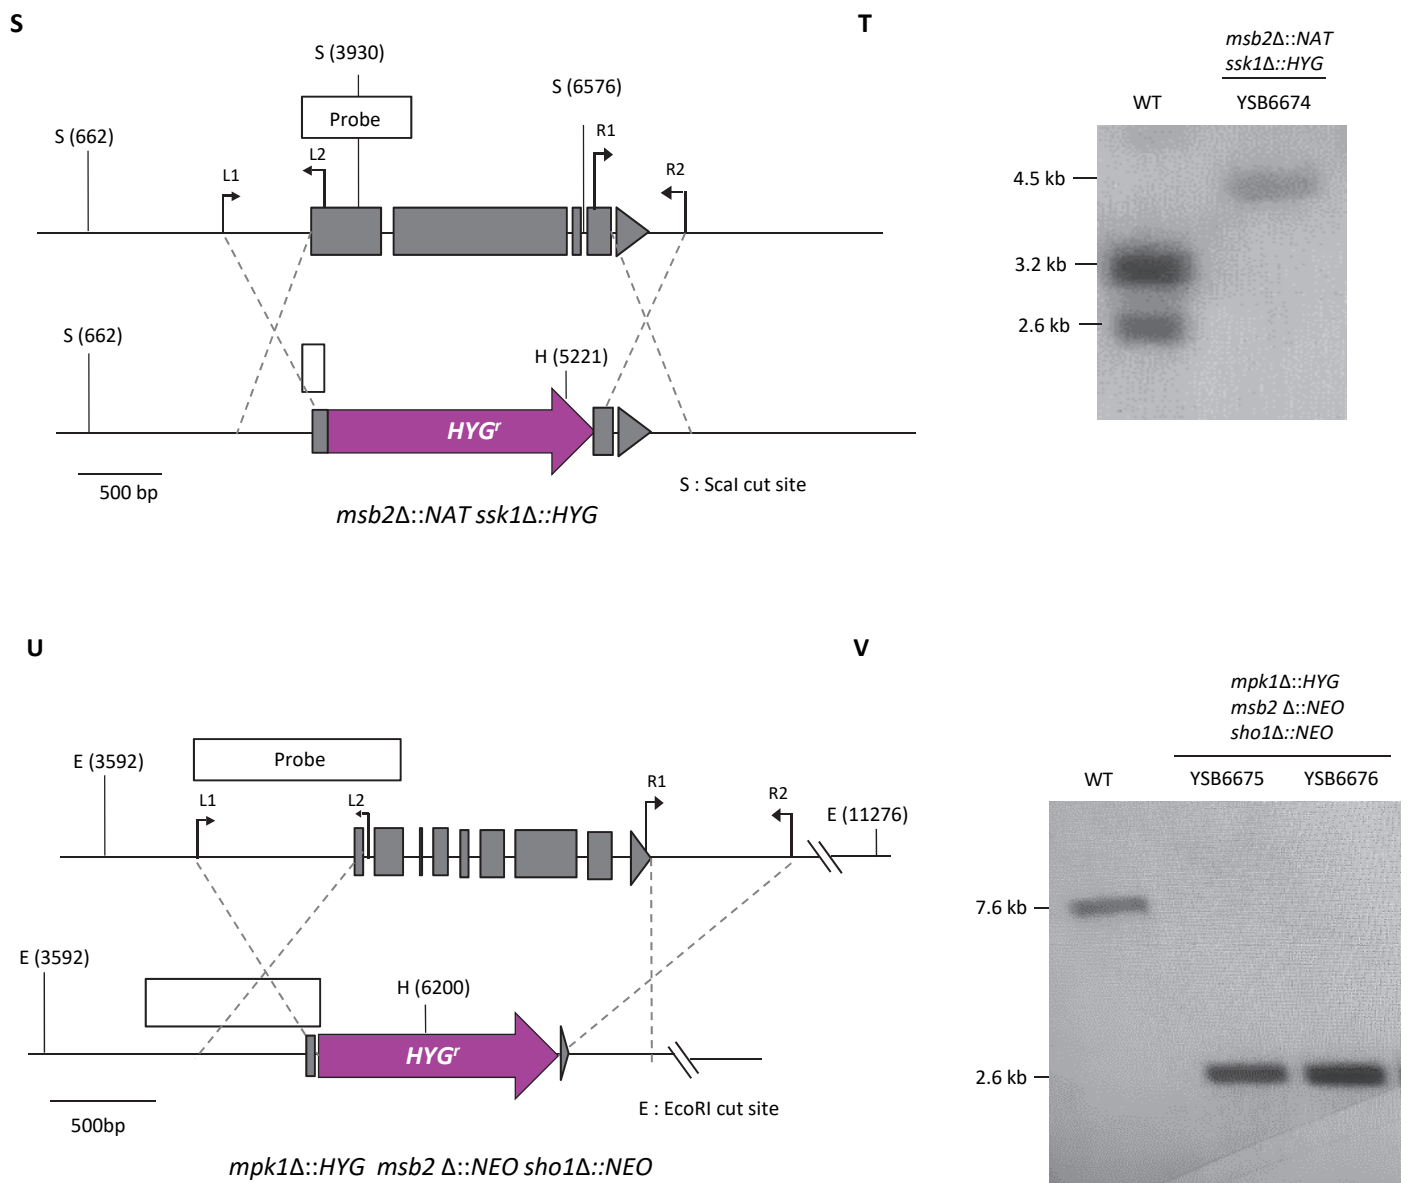

**Supplementary Fig. S1.** Construction of tagged or deletion strains. (A, C, E, G, I, K, M, O, Q, S and U) Schematic strategy for the construction of tagged or deletion strains. (B, D, F, H, J, L, N, P, R, T and V) The correct genotypes of the strains were confirmed by Southern blot analysis.

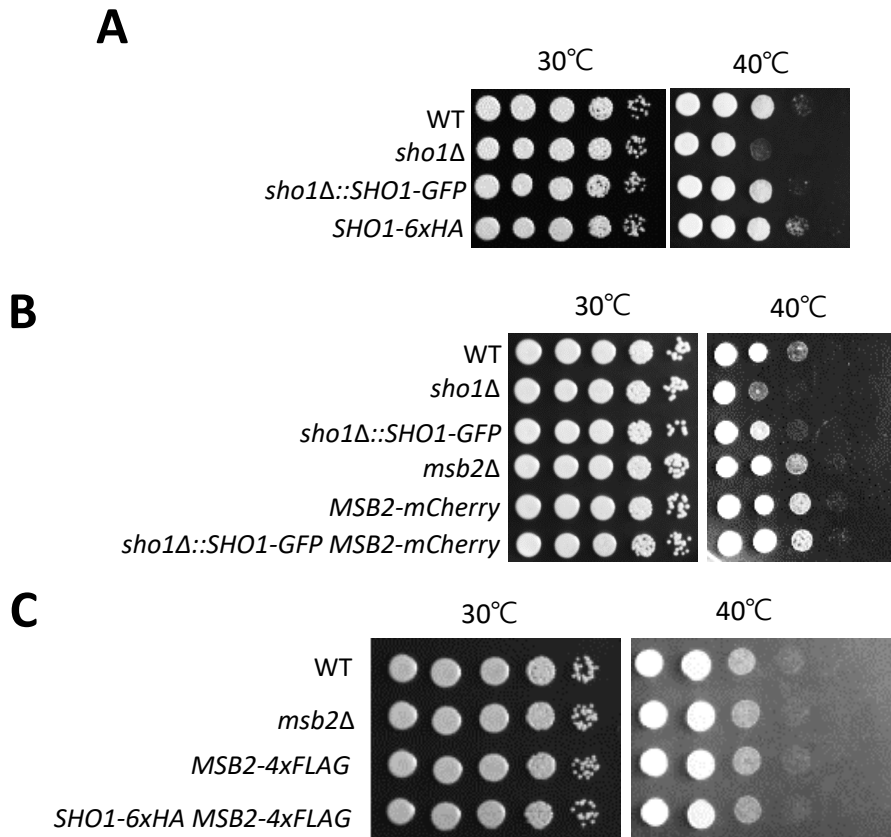

**Supplementary Figure S2. Phenotypic analyses of tagged strains.** *C. neoformans* strains were cultured overnight in liquid YPD medium at 30°C, and then the cultures were spotted on YPD medium. The spotted cells were incubated at 30°C or 40°C. [Strains: WT (H99), *sho1Δ* (YSB1719), *sho1Δ::SHO1-GFP* (YSB2753), *SHO1-6xHA* (YSB3593), *msb2Δ* (YSB3191), *MSB2-mCherry* (YSB4128), *sho1Δ::SHO1-GFP MSB2-mCherry* (YSB4132), *MSB2-4xFLAG* (YSB3631), *SHO1-6xHA MSB2-4xFLAG* (YSB3698)]



**A**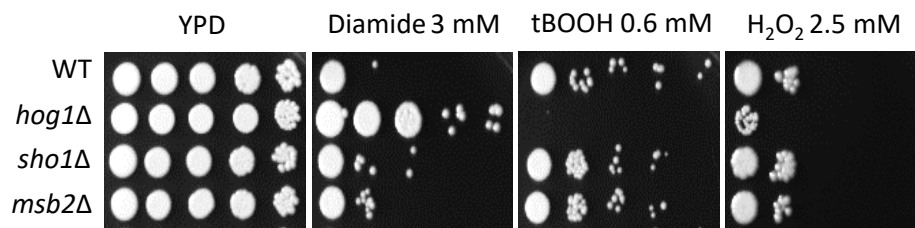**B**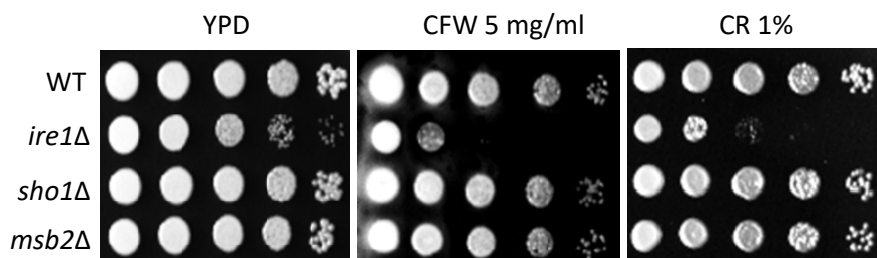

**Supplementary Fig. S3.** Sho1 and Msb2 are dispensable for resistance to oxidative damaging agents and cell wall destabilizers. Strains were grown overnight at 30°C in liquid YPD medium. The strains were serially diluted and spotted 3μl on YPD medium containing the Diamide, tBOOH, H<sub>2</sub>O<sub>2</sub>, CFW (calcofluor white) or CR (conco red). The plates were incubated at 30°C for 2 days and photographed (A-B).
